# Supplementary material for: Controllable distribution of conductive particles in polymer blends via a bilayer structure design: a strategy to fabricate shape-memory composites with tunable electro-responsive properties
Source: Royal Society of Chemistry journal article supplement (doi:10.1039/d0tc01854f), 2020-01-01
Supplement: d0tc01854f1.pdf [file d0tc01854f1.pdf]

## Supporting information

Controllable distribution of conductive particles in polymer blends via bilayer structure design: a strategy to fabricate shape-memory composites with tunable electro-responsive properties

Yu Zheng, Jingxian Qin, Jiabin Shen\* and Shaoyun Guo

Polymer Research Institute of Sichuan University, State Key Laboratory of Polymer Materials Engineering, Sichuan Provincial Engineering Laboratory of PLastic/Rubber Complex Processing Technology, Chengdu, Sichuan 610065, P. R. China

\* Corresponding to: Jiabin Shen (Email: [shenjb@scu.edu.cn](mailto:shenjb@scu.edu.cn))



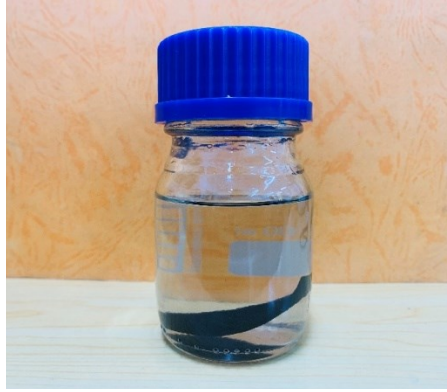

**Fig. S4** Image of the acetone etchant after soaking the TPU/PCL/MWCNT blending composite for 24 h.

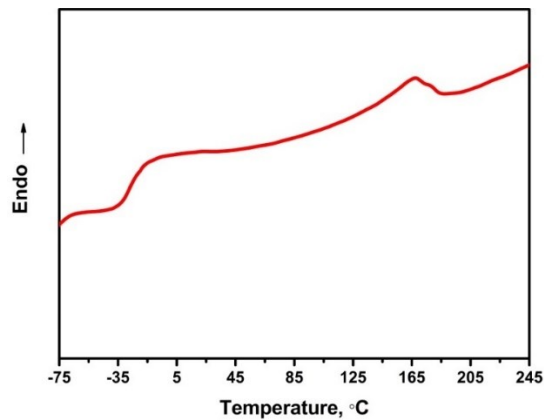

**Fig. S5** DSC heating curve of TPU.

**Video S1** The electro-responsive shape recovery progress of the cTPU5/PCL bilayer composite at 20V (MP4)

**Video S2** The electro-responsive shape recovery progress of the TPU/cPCL5 bilayer composite at 5V (MP4)

**Video S3** The electro-responsive shape recovery progress of the cTPU3/cPCL2 bilayer composite at 15V (MP4)

**Video S4** The electro-responsive shape recovery progress of the cTPU3/cPCL2 bilayer composite at 10V (MP4)
